# Supplementary material
Source: PubMed Central journal article supplement (PMC8011247)
Supplement: bjr.20201191.suppl-01.pdf [file bjr.20201191.suppl-01.pdf]

**Supplementary Table 1 – Details of qPCR primers used in this study**

| <b>Target</b>       | <b>RNA type</b> | <b>Method</b> | <b>Manufacturer</b> | <b>Reference</b> |
|---------------------|-----------------|---------------|---------------------|------------------|
| <b>miR-187-3p</b>   | MicroRNA        | TaqMan        | Applied Biosystems  | 001193           |
| <b><i>RNU48</i></b> | MicroRNA        | TaqMan        | Applied Biosystems  | 001006           |
| <b><i>PTEN</i></b>  | mRNA            | SYBR          | Qiagen              | QT00086933       |
| <b><i>KDM5B</i></b> | mRNA            | SYBR          | Qiagen              | QT00060648       |
| <b><i>DNMT1</i></b> | mRNA            | SYBR          | Qiagen              | QT00034335       |
| <b><i>EP300</i></b> | mRNA            | SYBR          | Qiagen              | QT00094500       |
| <b><i>B2M</i></b>   | mRNA            | SYBR          | Qiagen              | QT00088935       |
