# Supplementary material
Source: PubMed Central journal article supplement (PMC8011247)
Supplement: bjr.20201191.suppl-02.pdf [file bjr.20201191.suppl-02.pdf]

**Supplementary Table 2 – Details Antibodies used**

| <b>Target</b>              | <b>Manufacturer</b> | <b>Reference</b> | <b>Dilution</b> | <b>Origin Species</b> |
|----------------------------|---------------------|------------------|-----------------|-----------------------|
| <b>AKT (pan)</b>           | Cell signalling     | 4691             | 1:1000          | Rabbit mAb            |
| <b>Phospho AKT</b>         | Cell signalling     | 4060             | 1:2000          | Rabbit mAb            |
| <b>LC3b</b>                | Cell signalling     | 2775             | 1:1000          | Rabbit pAb            |
| <b>PARP</b>                | Cell signalling     | 9542             | 1:1000          | Rabbit pAb            |
| <b>PTEN</b>                | Cell signalling     | 9188             | 1:1000          | Rabbit mAb            |
| <b>β-actin</b>             | Santa Cruz          | SC-69879         | 1:10,000        | Mouse mAb             |
| <b>GAPDH</b>               | Ambion              | AM4300           | 1:10,000        | Mouse mAb             |
| <b>Mouse HRP<br/>(2°)</b>  | Dako                | P0449            | 1:2000          | Rabbit pAb            |
| <b>Rabbit HRP<br/>(2°)</b> | Dako                | P0448            | 1:2000          | Goat pAb              |

*mAb*, Monoclonal antibody; *pAb*, Polyclonal antibody
