# Supplementary material
Source: PubMed Central journal article supplement (PMC8011247)
Supplement: bjr.20201191.suppl-03.pdf [file bjr.20201191.suppl-03.pdf]

**Supplementary Table 3. Genes encoding PTEN transcription factors with miR-187 binding site**

| <i>PTEN</i> transcription factor (TF) | MiR-187 seedposition on TF | Conservation of miR-187 binding site on TF in primates (%) | Known TF function in transcriptional regulation of <i>PTEN</i>    | Reference |
|---------------------------------------|----------------------------|------------------------------------------------------------|-------------------------------------------------------------------|-----------|
| <i>MAZ</i>                            | chr16:29819949             | 89                                                         | Mechanism of PTEN regulation unknown                              | N/A       |
| <i>NFIC</i>                           | chr19:3435127              | 89                                                         | Mechanism of PTEN regulation unknown                              | N/A       |
| <i>E2F1</i>                           | chr20:32264211             | 78                                                         | One study demonstrated PTEN activation via binding to 5' UTR      | 8         |
| <b><i>EP300</i></b>                   | <b>chr22:41572511</b>      | <b>78</b>                                                  | <b>Negatively regulates PTEN</b>                                  | 9         |
| <i>BLC3</i>                           | chr19:45259490             | 67                                                         | Mechanism of PTEN regulation unknown                              | N/A       |
| <i>MYCBP2</i>                         | chr13:77835389             | 67                                                         | Mechanism of PTEN regulation unknown                              | N/A       |
| <i>NFIC</i>                           | chr19:3433521              | 67                                                         | Mechanism of PTEN regulation unknown                              | N/A       |
| <i>PHF8</i>                           | chrX:54069203              | 67                                                         | Mechanism of PTEN regulation unknown                              | N/A       |
| <i>PPARG</i>                          | chr4:23816000              | 67                                                         | Positive regulator                                                | 10        |
| <b><i>KDM5B</i></b>                   | <b>chr1:202698500</b>      | <b>56</b>                                                  | <b>Histone demethylase which transcriptionally represses PTEN</b> | 11        |
| <i>MAZ</i>                            | chr16:29821826             | 56                                                         | Mechanism of PTEN regulation unknown                              | N/A       |
| <i>SRFBP1</i>                         | chr5:121356312             | 56                                                         | Mechanism of PTEN regulation unknown                              | N/A       |

---

|                     |                       |           |                                         |               |
|---------------------|-----------------------|-----------|-----------------------------------------|---------------|
| <i>PPARG</i>        | chr4:23822068         | 56        | Positive regulator                      | <sup>10</sup> |
| <i>FOXP2</i>        | chr7:113726400        | 44        | Mechanism of PTEN regulation<br>unknown | N/A           |
| <i>MAFK</i>         | chr7:1580362          | 44        | Mechanism of PTEN regulation<br>unknown | N/A           |
| <i>WRNIP1</i>       | chr6:2766547          | 44        | Mechanism of PTEN regulation<br>unknown | N/A           |
| <b><i>DNMT1</i></b> | <b>chr19:10248642</b> | <b>44</b> | <b>Negative regulator</b>               | <sup>10</sup> |

---
