# Supplementary material
Source: PubMed Central journal article supplement (PMC8011247)
Supplement: bjr.20201191.suppl-05.pdf [file bjr.20201191.suppl-05.pdf]

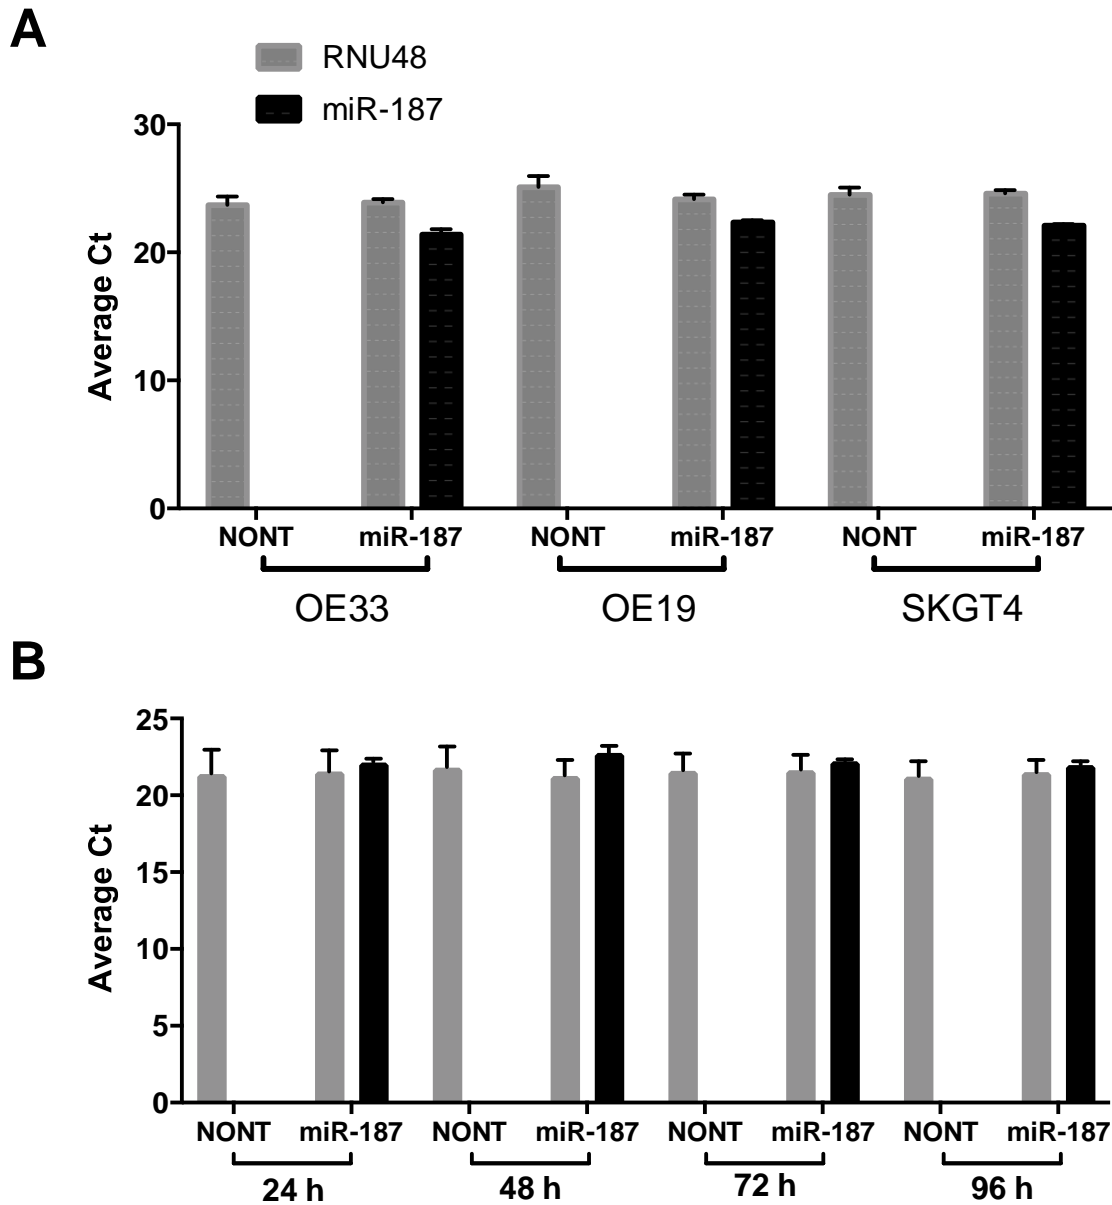

**Supplementary Figure 1 – Validation of mir-187 overexpression**

Cells were seeded into 6cm dishes and transiently transfected with 5 nM pre-miR-187. miR187 expression levels were assessed 24 h post transfection for all cell lines (A) or for a series of timepoints post transfection for OE33 cell line (B) using TaqMan qPCR. MiR-187 expression was also assessed in mock transfected (NONT) control cells. The average Ct values for miR-187 and the endogenous control RNU48 are presented for each sample. Data represent the average of n=3 experimental repeats. Error bars represent mean  $\pm$  SEM.
