# Supplementary material
Source: PubMed Central journal article supplement (PMC8011247)
Supplement: bjr.20201191.suppl-06.pdf [file bjr.20201191.suppl-06.pdf]

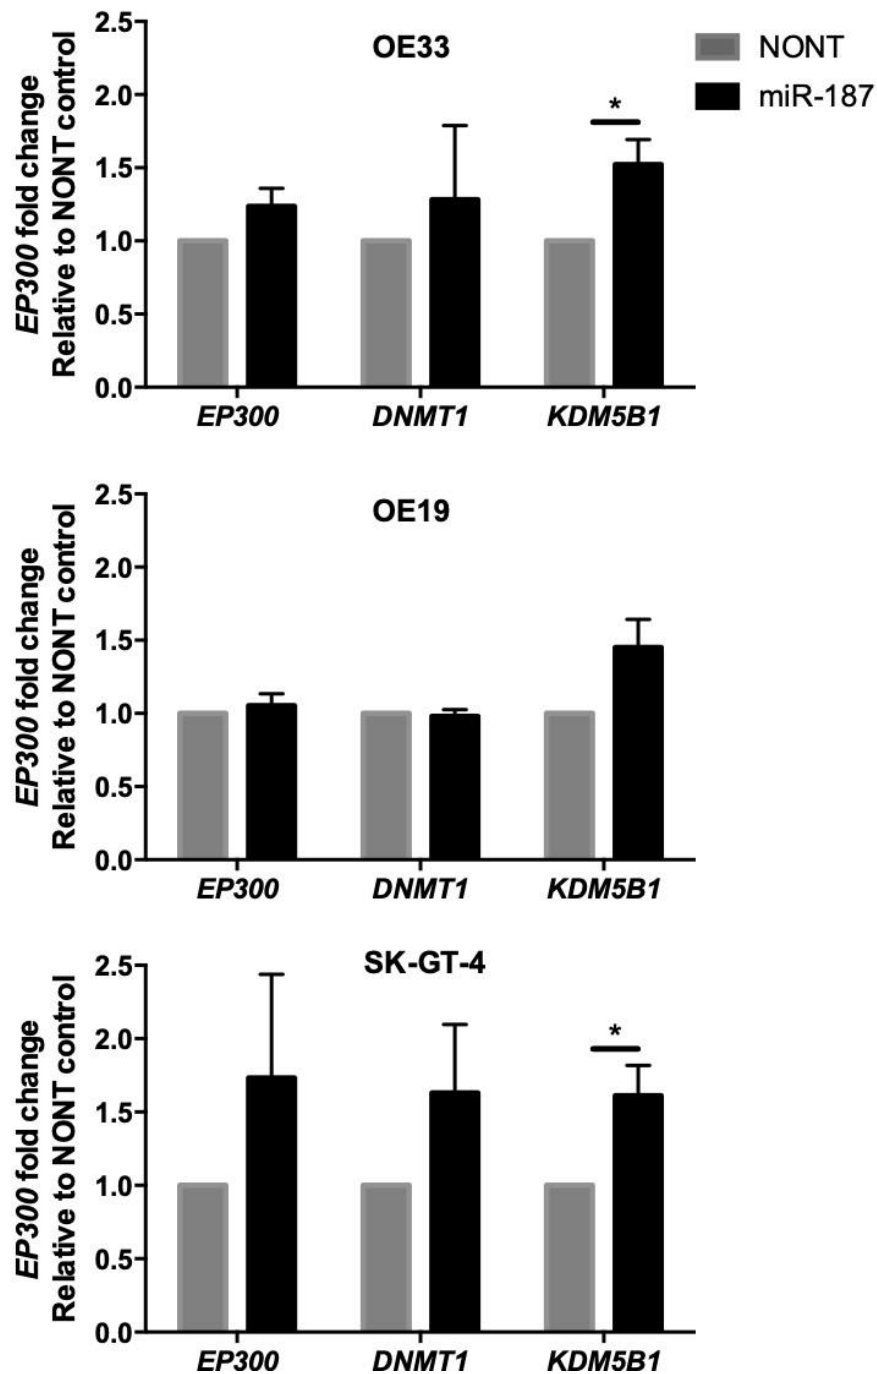

**Supplementary Figure 2 – Evaluation of potential transcriptional regulators of PTEN downstream of miR-187**

Cells were reverse transfected with 5 nM miR-187 precursor or mock transfected (NONT) and harvested 24 h post transfection. *EP300*, *DNMT1*, and *KDM5B* expression was analysed by qPCR, and transcript levels were normalised to mock transfected control cells (NONT). *B2M* was used as a housekeeping gene. Histogram represents an average of n=3 independent experimental repeats. Error bars represent mean  $\pm$  SEM. Statistical analysis was performed using the Student's t-test.
