# Supplementary material
Source: PubMed Central journal article supplement (PMC8011247)
Supplement: bjr.20201191.suppl-07.pdf [file bjr.20201191.suppl-07.pdf]

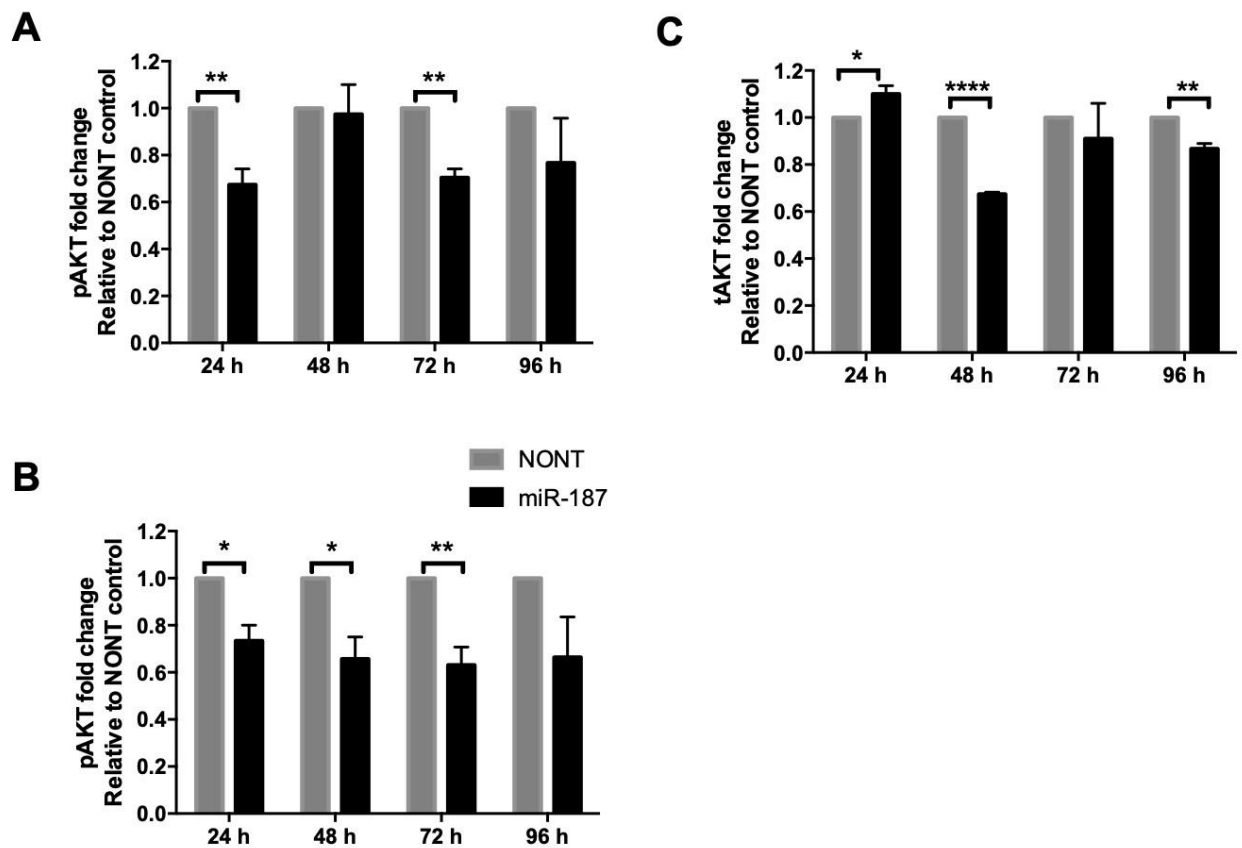

### Supplementary Figure 3 – Densitometry quantification of pAKT and tAKT

Densitometry of western blots shown in Figure 2B. Band intensity was quantified using ImageJ. Histograms represent the average band intensity for pAKT normalised to tAKT (A) pAKT normalised to  $\beta$ -actin control (B) and tAKT normalised to  $\beta$ -actin control (C) All calculations are relative to the mock transfected control (NONT) for each time point. Histogram represents an average of n=3 independent experimental repeats. Error bars represent mean  $\pm$  SEM. Statistical analysis was performed using the Student's t-test: \*p < 0.05, \*\*p < 0.01, \*\*\*\*p < 0.0001.
