# Supplementary material
Source: PubMed Central journal article supplement (PMC8011247)
Supplement: bjr.20201191.suppl-08.pdf [file bjr.20201191.suppl-08.pdf]

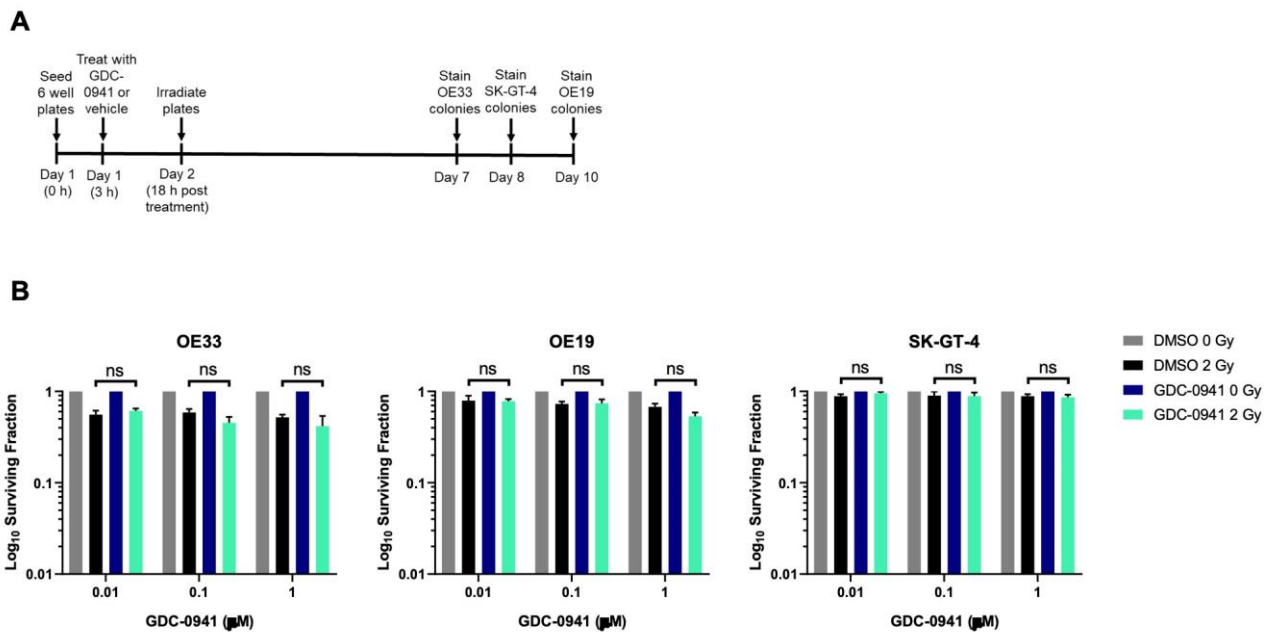

**Supplementary Figure 4 – GDC-0941 significantly reduced SK-GT-4 clonogenic survival as a single agent and has an additive effect in combination with physiologically relevant levels of irradiation**

Cells were seeded into 6 well plates for the clonogenic assay and treated with GDC-0941 or the corresponding vehicle control once adhered. Plates were transported to the irradiator and exposed to 0 Gy or 2 Gy irradiation doses 18 h post treatment. Colonies were stained and counted. The surviving fraction was calculated relative to the mock transfected (Mock) 0 Gy control. Treatment with GDC-0941 or vehicle control (DMSO) was removed at the time of staining. B Treatment with GDC-0941 or vehicle control (DMSO) was removed 24 h post irradiation and replaced with complete medium. (A) Treatment scheduling. (B) Survival fractions for all conditions, relative to GDC-0941-treated samples. Error bars represent mean  $\pm$  SEM. Statistical analysis was performed using the Student's t-test.
